# Supplementary material
Source: Research Square preprint supplement (doi:10.21203/rs.3.rs-9247147/v1)
Supplement: Supplementary file 1 [file 681a949720c8250ae6c20518.docx]

[[1]](#footnote-0)

**Table S1 HDS-R Scores by gender Over the 5-year follow-up period**

| HDS-R All Male Female | | | | *P* value |
| --- | --- | --- | --- | --- |
| Baseline, n | 572 | 300 | 272 | - |
| Mean(±SD) | 27.13 ± 2.80 | 27.31 ± 2.81 | 26.45 ± 2.90 | 0.002 |
| 1st follow-up | 568 | 408 | 160 | - |
| Mean(±SD) | 26.32 ± 3.01 | 26.51 ± 2.96 | 25.75 ± 3.12 | 0.15 |
| 2nd follow-up | 565 | 407 | 158 | - |
| Mean(±SD) | 25.50 ± 4.20 | 25.70 ± 3.18 | 24.90 ± 3.35 | 0.48 |

1. *P-values were calculated using independent samples t-tests to compare HDS-R scores between males and females at the same follow-up time point.

   †Abbreviation: HDS-R = Hasegawa Dementia Scale-Revised (total score range: 0–30; higher scores indicate better cognitive function).

   ‡All "Mean ± SD" values are reported to two decimal places for consistency.

   §Sample size changes at each follow-up time point are due to loss to follow-up . [↑](#footnote-ref-0)
