# Supplementary material
Source: Research Square preprint supplement (doi:10.21203/rs.3.rs-9247147/v1)
Supplement: Supplementary file 2 [file 940c5b94632d651020897a4b.docx]

**Supplementary Table S2**

**Comparison of CVAI and BMI in relation to cognitive decline (LMM)**

| *β (95% CI)*  *P* | | |
| --- | --- | --- |
| CVAI group× time(without BMI adjustment) | -0.681 (-0.963,-0.399) | <0.001 |
| CVAI group× time(with BMI adjustment) | -0.576 (-0.862,-0.290) | <0.001 |
| BMI× time | -0.045 (-0.132, 0.042) | 0.31 |

[[1]](#footnote-0)

1. *Abbreviation: HDS-R = Hasegawa Dementia Scale-Revised; CVAI = Chinese Visceral Adiposity Index; Q = Quartile.

   †All "Mean ± SD" values are presented with two decimal places for consistency; Q1 represents the lowest baseline CVAI group, and Q4 represents the highest baseline CVAI group.

   ‡Sample size changes at each follow-up time point are due to loss to follow-up . [↑](#footnote-ref-0)
