# Supplementary material
Source: Research Square preprint supplement (doi:10.21203/rs.3.rs-9247147/v1)
Supplement: Supplementary file 3 [file ea7095bd1dd9277eb8525569.docx]

**Table S4. Comparison of baseline characteristics between included and excluded participants**

| **Variables Included (n = 572) Excluded participants (n = 725) P value** | | | |
| --- | --- | --- | --- |
| **Age, years** | 74.8 ± 3.6 | 74.6 ± 3.9 | 0.321 |
| **Male, n (%)** | 300 (52.4) | 372 (51.3) | 0.689 |
| **BMI, kg/m²** | 23.7 ± 3.4 | 23.9 ± 3.6 | 0.297 |
| **Education level, n (%)** |  |  | 0.874 |
| Illiterate | 386 (67.5) | 490 (67.6) |  |
| Primary school | 134 (23.4) | 169 (23.3) |  |
| Junior high or above | 52 (9.0) | 66 (9.1) |  |
| **Smoking status, n (%)** |  |  | 0.912 |
| Current/former smoker | 232 (40.6) | 294 (40.6) |  |
| Never smoker | 340 (59.4) | 431 (59.4) |  |
| **Alcohol consumption, n (%)** |  |  | 0.895 |
| Current/former drinker | 245 (42.8) | 310 (42.8) |  |
| Never drinker | 327 (57.2) | 415 (57.2) |  |
| **Hypertension, n (%)** | 285 (49.8) | 362 (49.9) | 0.963 |
| **Fasting blood glucose, mmol/L** | 5.30 ± 1.30 | 5.33 ± 1.32 | 0.678 |

[[1]](#footnote-0)

1. *Abbreviations: HDS-R, Hasegawa Dementia Scale-Revised; CVAI, Chinese Visceral Adiposity Index; BMI, body mass index.
   †Values are presented as mean ± standard deviation or number (percentage), as appropriate. P values were calculated using independent t-tests for continuous variables and chi-square tests for categorical variables. [↑](#footnote-ref-0)
